# Supplementary material for: Synthesis of arylphosphonates catalyzed by Pd-imino-Py-γ-Fe2O3as a new magnetically recyclable heterogeneous catalyst in pure water without requiring any additive
Source: Royal Society of Chemistry journal article supplement (doi:10.1039/c5ra27330g), 2016-01-01
Supplement: c5ra27330g1.pdf [file c5ra27330g1.pdf]

## SUPPORTING INFORMATION

**Title:** Synthesis of arylphosphonates catalyzed by Pd-imino-Py- $\gamma$ -Fe<sub>2</sub>O<sub>3</sub> as a new magnetically recyclable heterogeneous catalyst in pure water without requiring any additive

**Author(s):** Sara Sobhani,\* Zohreh Ramezani

### Table of Contents:

|                                                                                                                                                             |    |
|-------------------------------------------------------------------------------------------------------------------------------------------------------------|----|
| General information                                                                                                                                         | 2  |
| Synthesis of iminopyridine                                                                                                                                  | 2  |
| Synthesis of Schiff base immobilized on $\gamma$ -Fe <sub>2</sub> O <sub>3</sub> (imino-Py- $\gamma$ -Fe <sub>2</sub> O <sub>3</sub> )                      | 2  |
| Synthesis of palladium-Schiff base complex immobilized on $\gamma$ -Fe <sub>2</sub> O <sub>3</sub> (Pd-imino-Py- $\gamma$ -Fe <sub>2</sub> O <sub>3</sub> ) | 2  |
| Figure 1. Nitrogen adsorption-desorption isotherms of Pd-imino-Py- $\gamma$ -Fe <sub>2</sub> O <sub>3</sub>                                                 | 3  |
| Figure S2. XRD patterns of Pd-imino-Py- $\gamma$ -Fe <sub>2</sub> O <sub>3</sub>                                                                            | 3  |
| Figure S3. SEM of Pd-imino-Py- $\gamma$ -Fe <sub>2</sub> O <sub>3</sub>                                                                                     | 3  |
| Figure S4. TEM of Pd-imino-Py- $\gamma$ -Fe <sub>2</sub> O <sub>3</sub>                                                                                     | 4  |
| Figure S5. FT-IR spectra of $\gamma$ -Fe <sub>2</sub> O <sub>3</sub> and Pd-imino-Py- $\gamma$ -Fe <sub>2</sub> O <sub>3</sub>                              | 4  |
| Figure S6. TGA of Pd-imino-Py- $\gamma$ -Fe <sub>2</sub> O <sub>3</sub>                                                                                     | 4  |
| Figure S7. XPS spectrum of Pd-imino-Py- $\gamma$ -Fe <sub>2</sub> O <sub>3</sub>                                                                            | 5  |
| Figure S8. Magnetization curves of $\gamma$ -Fe <sub>2</sub> O <sub>3</sub> and Pd-imino-Py- $\gamma$ -Fe <sub>2</sub> O <sub>3</sub>                       | 6  |
| Characterization data of the products                                                                                                                       | 7  |
| Copies of <sup>1</sup> H and <sup>13</sup> C NMR spectra                                                                                                    | 10 |
| References                                                                                                                                                  | 22 |

## General information

Chemicals were purchased from Merck Chemical Company. NMR spectra were recorded on a Bruker Avance DPX-400 and 300 using deuterated  $\text{CDCl}_3$  as solvent and TMS as internal standard. The purity of the products and the progress of the reactions were accomplished by TLC on silica-gel polygram SILG/UV254 plates. The BET surface area measurements were performed on a BEL-MAX (Japan) instrument at liquid nitrogen temperature. TEM analysis was performed using TEM microscope (Philips CM30). FT-IR spectra were recorded on a Shimadzu Fourier Transform Infrared Spectrophotometer (FT-IR-8300). Thermo gravimetric analysis (TGA) was performed using a Shimadzu thermo gravimetric analyzer (TG-50). Elemental analysis was carried out on a Costech 4010 CHN elemental analyzer. The morphology of the products was determined by using Hitachi Japan, model s4160 Scanning Electron Microscopy (SEM) at accelerating voltage of 15 KV. Power X-ray diffraction (XRD) was performed on a Bruker D8-advance X-ray diffractometer with  $\text{Cu K}_\alpha$  ( $\lambda = 0.154 \text{ nm}$ ) radiation. This system was equipped with a concentric hemispherical (CHA) electron energy analyzer (Specs model EA10 plus) suitable for X-ray photoelectron spectroscopy (XPS). The content of Pd in the catalyst was determined by OPTIMA 7300DV ICP analyzer. Room temperature magnetization isotherms were obtained using a vibrating sample magnetometer (VSM, Lake Shore 7400).

## Synthesis of iminopyridine

Pyridine-2-carbaldehyde (0.5 g) was added to a magnetically stirring mixture of 4-aminophenol (0.5 g) in MeOH (10 mL). After refluxing for 3 h, the mixture was cooled to room temperature. The resulting yellow crystals (iminopyridine ligand) was separated by filtration, washed with MeOH ( $3 \times 10 \text{ mL}$ ) and dried under vacuum.

## Synthesis of Schiff base immobilized on $\gamma\text{-Fe}_2\text{O}_3$ (imino-Py- $\gamma\text{-Fe}_2\text{O}_3$ )

The maghemite ( $\gamma\text{-Fe}_2\text{O}_3$ ) nanoparticles were synthesized by a reported chemical co-precipitation technique of ferric and ferrous ions in alkali solution with minor modifications.<sup>1</sup> Using BET method, values of  $91 \text{ m}^2 \text{ g}^{-1}$  and  $14.3 \text{ nm}$  were found for surface area and mean pore diameter of  $\gamma\text{-Fe}_2\text{O}_3$ , respectively (Figure 1).  $\gamma\text{-Fe}_2\text{O}_3$  was chloro-functionalized by the reaction with 3-chloropropyltrimethoxysilane.<sup>2</sup> A solution of chloro-functionalized  $\gamma\text{-Fe}_2\text{O}_3$  (1.7 g) in DMF (10 mL) was added dropwise to a stirring solution of iminopyridine (0.15 g) and NaH (0.005 g) in DMF (5 mL), under Ar atmosphere at  $80^\circ\text{C}$  within 1 h. The reaction mixture was stirred at  $80^\circ\text{C}$  for another 24 h. The resulting Schiff base immobilized on  $\gamma\text{-Fe}_2\text{O}_3$  was separated by an external magnet, washed with acetone ( $3 \times 10 \text{ mL}$ ) and dried under vacuum. The loading amount of Schiff base was  $0.28 \text{ mmol g}^{-1}$  catalyst based on elemental analysis.

## Synthesis of palladium-Schiff base complex immobilized on $\gamma\text{-Fe}_2\text{O}_3$ (Pd-imino-Py- $\gamma\text{-Fe}_2\text{O}_3$ )

The synthesized Schiff base immobilized on  $\gamma\text{-Fe}_2\text{O}_3$  (1.7 g) was added to a solution of palladium acetate (0.12 g) in dry acetone (5 mL). The reaction mixture was stirred at room temperature for 24 h. The solid was separated by an external magnet, and washed with acetone ( $3 \times 10 \text{ mL}$ ) and dried under vacuum to afford Pd-imino-Py- $\gamma\text{-Fe}_2\text{O}_3$ .

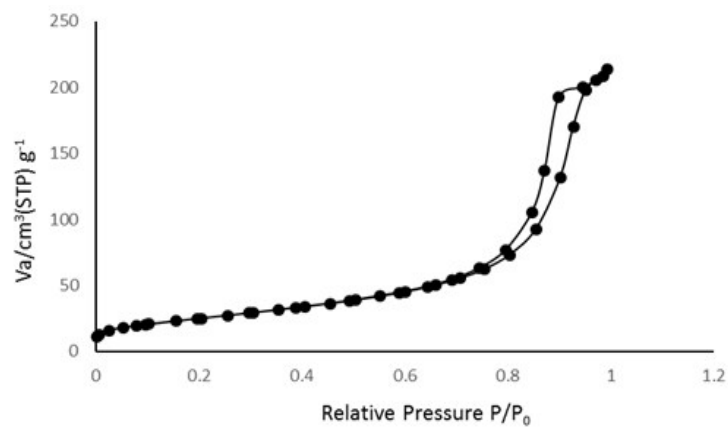

**Figure 1.** Nitrogen adsorption-desorption isotherms of Pd-imino-Py- $\gamma$ -Fe<sub>2</sub>O<sub>3</sub>

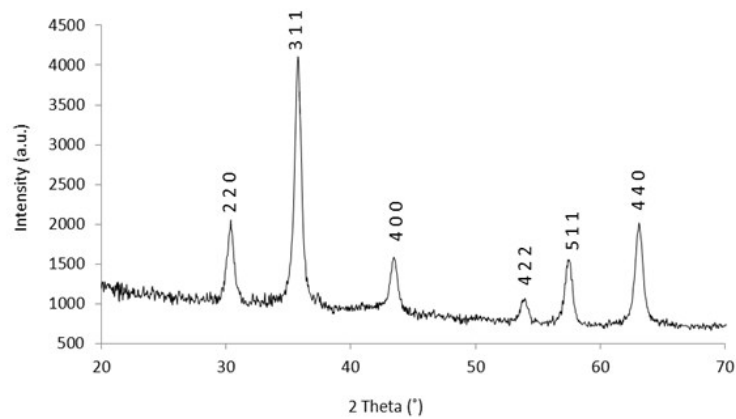

**Figure S2.** XRD patterns of Pd-imino-Py- $\gamma$ -Fe<sub>2</sub>O<sub>3</sub>

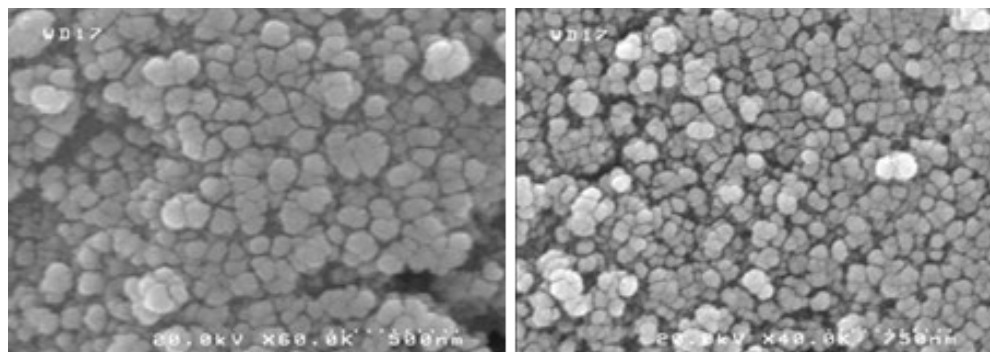

**Figure S3.** SEM of Pd-imino-Py- $\gamma$ -Fe<sub>2</sub>O<sub>3</sub>

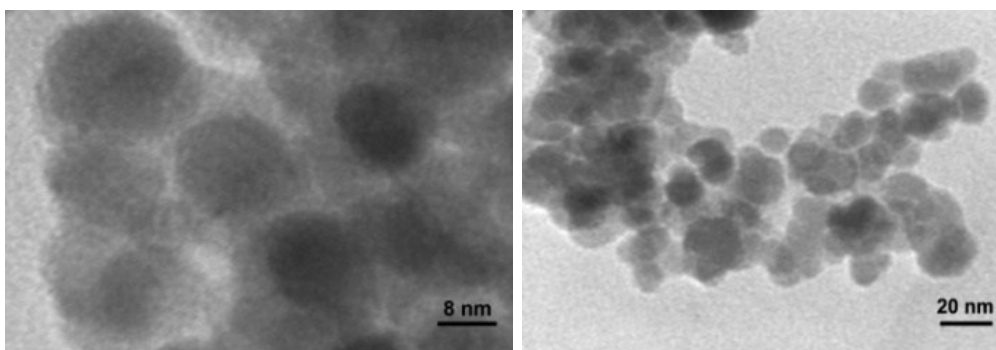

**Figure S4.** TEM of Pd-imino-Py- $\gamma$ -Fe<sub>2</sub>O<sub>3</sub>

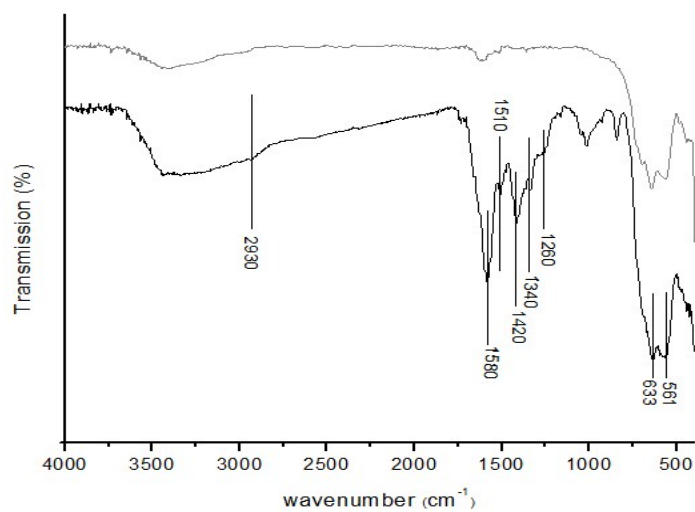

**Figure S5.** FT-IR spectra of  $\gamma$ -Fe<sub>2</sub>O<sub>3</sub> (gray), Pd-imino-Py- $\gamma$ -Fe<sub>2</sub>O<sub>3</sub> (black)

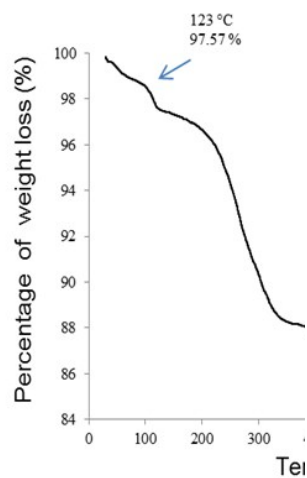

**Figure**  
imino-P

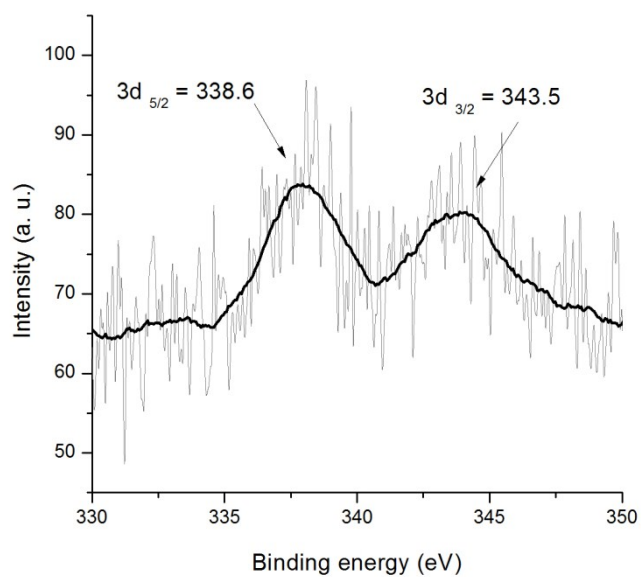

TGA of Pd-  
Fe<sub>2</sub>O<sub>3</sub>

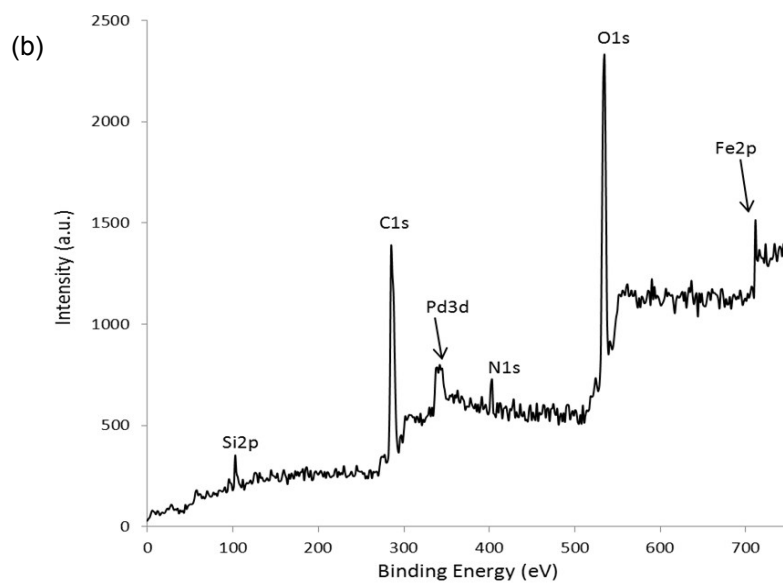

**Figure S7.** (a) XPS spectrum of Pd in Pd-imino-Py- $\gamma$ -Fe<sub>2</sub>O<sub>3</sub>, (b) XPS spectrum of all elements of Pd-imino-Py- $\gamma$ -Fe<sub>2</sub>O<sub>3</sub>

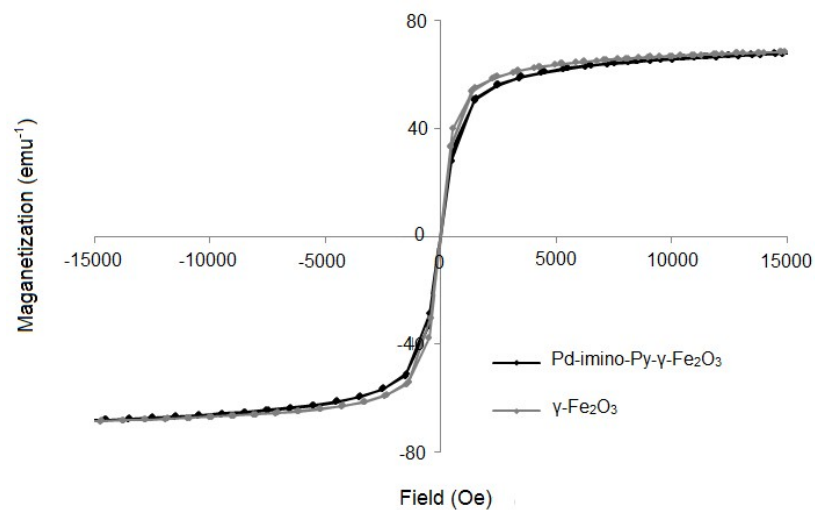

**Figure S8.** Magnetization curves of  $\gamma\text{-Fe}_2\text{O}_3$  and Pd-imino-Py- $\gamma\text{-Fe}_2\text{O}_3$

**Characterization data of the products**

**Diethyl phenylphosphonate:** Isolated as colorless oil (Table 1, entry 1: 98%, 209.7 mg; entry 3, 93%, 199.0 mg, entry 10: 88%, 188.3 mg; entry 20: 75%, 160.5 mg; entry 21: 80%, 171.2 mg)

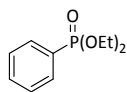

$^1\text{H}$  NMR (400 MHz,  $\text{CDCl}_3$ ):  $\delta$  1.30 (t,  $J_{\text{HH}} = 6.8$  Hz, 6 H), 4.16-4.05 (m, 4 H), 7.47-7.42 (m, 2 H), 7.53-7.51 (m, 1 H), 7.80 (dd,  $J_{\text{HH}} = 13.2$ ,  $J_{\text{HH}} = 8.4$ , 2 H), ppm.  $^{13}\text{C}$  NMR (100 MHz,  $\text{CDCl}_3$ ):  $\delta$  16.3 (d,  $J_{\text{CP}} = 7.0$  Hz), 62.0 (d,  $J_{\text{CP}} = 5.0$  Hz), 131.7 (d,  $J_{\text{CP}} = 10.0$  Hz), 128.3 (d,  $J_{\text{CP}} = 186.0$  Hz), 128.4 (d,  $J_{\text{CP}} = 15.0$  Hz), 132.3 (d,  $J_{\text{CP}} = 3.0$  Hz) ppm.

**Diethyl 4-methoxyphenylphosphonate:** Isolated as colorless oil (Table 1, entry 2: 95%, 231.8 mg; entry 4: 83%, 202.5 mg)

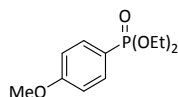

$^1\text{H}$  NMR (400 MHz,  $\text{CDCl}_3$ ):  $\delta$  1.27 (t,  $J_{\text{HH}} = 7.2$  Hz, 6 H), 3.80 (s, 3 H), 4.09-3.97 (m, 4 H), 6.93 (dd,  $J_{\text{HH}} = 8.8$  Hz,  $J_{\text{HH}} = 3.2$  Hz, 2 H), 7.71 (dd,  $J_{\text{HH}} = 12.8$  Hz,  $J_{\text{HH}} = 8.8$  Hz, 2 H) ppm.  $^{13}\text{C}$  NMR (100 MHz,  $\text{CDCl}_3$ ):  $\delta$  16.2 (d,  $J_{\text{CP}} = 6.0$  Hz), 55.2, 61.8 (d,  $J_{\text{CP}} = 6.0$  Hz), 113.9 (d,  $J_{\text{CP}} = 16.0$  Hz), 119.3 (d,  $J_{\text{CP}} = 193.0$  Hz), 133.7 (d,  $J_{\text{CP}} = 12.0$  Hz), 162.8 (d,  $J_{\text{CP}} = 4.0$  Hz) ppm.

**Diethyl 4-nitrophenylphosphonate:** Isolated as oil (Table 1, entry 5: 92%, 238.2 mg, entry 11: 89%, 230.5 mg).

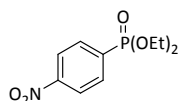

$^1\text{H}$  NMR (300 MHz,  $\text{CDCl}_3$ ):  $\delta$  1.34 (t,  $J_{\text{HH}} = 6.9$  Hz, 6H), 4.27-4.06 (m, 4H), 8.00 (dd,  $J_{\text{HH}} = 12.7$  Hz,  $J_{\text{HH}} = 8.7$  Hz, 1H), 8.3 (dd,  $J_{\text{HH}} = 8.7$  Hz,  $J_{\text{HH}} = 3.3$  Hz, 1H) ppm.  $^{13}\text{C}$  NMR (75 MHz,  $\text{CDCl}_3$ ):  $\delta$  16.1 (d,  $J_{\text{CP}} = 6.7$  Hz), 16.3 (d,  $J_{\text{CP}} = 6.0$  Hz), 62.7 (d,  $J_{\text{CP}} = 5.2$  Hz), 123.3 (d,  $J_{\text{CP}} = 15.0$  Hz), 133.0 (d,  $J_{\text{CP}} = 10.5$  Hz), 135.8 (d,  $J_{\text{CP}} = 185.2$  Hz), 150.2 (d,  $J_{\text{CP}} = 3.7$  Hz) ppm.

**Diethyl 4-acetylphenylphosphonate:** Isolated as oil (Table 1, entry 6: 85%, 217.6 mg).

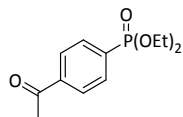

$^1\text{H}$  NMR (300 MHz,  $\text{CDCl}_3$ ):  $\delta$  1.32 (t,  $J_{\text{HH}} = 6.9$  Hz, 6 H), 2.64 (s, 3H), 4.21-4.05 (m, 4H), 7.91 (dd,  $J_{\text{HH}} = 8.1$  Hz,  $J_{\text{HH}} = 12.7$  Hz, 2H), 8.04-8.00 (m, 2H) ppm.  $^{13}\text{C}$  NMR (75 MHz,  $\text{CDCl}_3$ ):  $\delta$  16.3 (d,  $J_{\text{CP}} = 6.7$  Hz), 26.85 (s, 3H), 62.4 (d,  $J_{\text{CP}} = 5.2$  Hz), 128.0 (d,  $J_{\text{CP}} = 15.0$  Hz), 130.4 (d,  $J_{\text{CP}} = 95.2$  Hz), 132.0 (d,  $J_{\text{CP}} = 9.7$  Hz), 134.61, 139.8 (d,  $J_{\text{CP}} = 3$ ), 197.5 ppm.

**Diethyl 2-methylphenylphosphonate:** Isolated as oil (Table 1, entry 7: 95%, 216.6 mg).

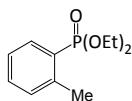

$^1\text{H}$  NMR (300 MHz,  $\text{CDCl}_3$ ):  $\delta$  1.24 (t,  $J_{\text{HH}} = 6.6$  Hz, 6 H), 2.49 (s, 3H), 3.93-4.13 (m, 4H), 7.20-7.14 (m, 2H), 7.34 (t,  $J_{\text{HH}} = 6.0$  Hz, 1H), 7.87-7.79 (m, 1H) ppm.  $^{13}\text{C}$  NMR (75 MHz,  $\text{CDCl}_3$ ):  $\delta$  16.3 (d,  $J_{\text{CP}} = 6.7$  Hz), 21.1 (d,  $J_{\text{CP}} = 3.0$  Hz), 61.8 (d,  $J_{\text{CP}} = 6.0$  Hz), 125.3 (d,  $J_{\text{CP}} = 15.0$  Hz), 126.8 (d,  $J_{\text{CP}} = 183.0$  Hz), 131.1 (d,  $J_{\text{CP}} = 14.2$  Hz), 132.4 (d,  $J_{\text{CP}} = 3$ ), 133.8 (d,  $J_{\text{CP}} = 9.7$ ), 141.7 (d,  $J_{\text{CP}} = 9.7$ ) ppm.

**Diethyl 4-tolylphosphonate:** Isolated as oil (Table 1, entry 8: 89%, 202.9 mg, entry 13: 93%, 212.0 mg).

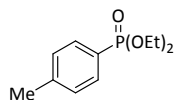

$^1\text{H}$  NMR (300 MHz,  $\text{CDCl}_3$ ):  $\delta$  1.33 (t,  $J_{\text{HH}} = 6.9$  Hz, 6H), 2.42 (s, 3H), 4.21-4.01 (m, 4H), 7.29 (dd,  $J_{\text{HH}} = 8.1$  Hz,  $J_{\text{HH}} = 3.3$  Hz, 2H), 7.72 (dd,  $J_{\text{HH}} = 13.2$  Hz,  $J_{\text{HH}} = 8.1$  Hz, 2H) ppm.  $^{13}\text{C}$  NMR (75 MHz,  $\text{CDCl}_3$ ):  $\delta$  16.1 (d,  $J_{\text{CP}} = 6.7$  Hz), 16.3 (d,  $J_{\text{CP}} = 6.7$  Hz), 21.6, 61.9 (d,  $J_{\text{CP}} = 5.2$  Hz), 124.9 (d,  $J_{\text{CP}} = 188.2$  Hz), 129.2 (d,  $J_{\text{CP}} = 15.0$  Hz), 131.8 (d,  $J_{\text{CP}} = 9.7$  Hz), 142.9 (d,  $J_{\text{CP}} = 3.0$  Hz) ppm.

**Diethyl 4-vinylphenylphosphonate:** Isolated as oil (Table 1, entry 9: 78%, 187.2 mg).

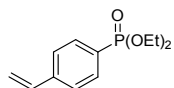

$^1\text{H}$  NMR (300 MHz,  $\text{CDCl}_3$ ):  $\delta$  1.33 (t,  $J_{\text{HH}} = 6.9$  Hz, 6H), 4.20-4.04 (m, 4H), 5.4 (d,  $J_{\text{HH}} = 10.8$  Hz, 1H), 5.87 (d,  $J_{\text{HH}} = 17.4$  Hz, 1H), 6.75 (dd,  $J_{\text{HH}} = 17.4$  Hz,  $J_{\text{HH}} = 10.8$  Hz, 1H), 7.52-7.48 (m, 2H), 7.78 (dd,  $J_{\text{HH}} = 12.9$  Hz,  $J_{\text{HH}} = 8.1$  Hz, 2H) ppm.  $^{13}\text{C}$  NMR (75 MHz,  $\text{CDCl}_3$ ):  $\delta$  16.1 (d,  $J_{\text{CP}} = 6.7$  Hz), 16.3 (d,  $J_{\text{CP}} = 6.0$  Hz), 62.1 (d,  $J_{\text{CP}} = 5.2$  Hz), 116.5, 63.6 (d,  $J_{\text{CP}} = 6.0$  Hz), 126.1 (d,  $J_{\text{CP}} = 15.0$  Hz), 127.2 (d,  $J_{\text{CP}} = 187.5$  Hz), 132.1 (d,  $J_{\text{CP}} = 9.7$  Hz), 135.9, 141.4 (d,  $J_{\text{CP}} = 3.0$  Hz) ppm.

**Diethyl 4-chlorophenylphosphonate:** Isolated as colorless oil (Table 1, entry 14: 98%, 244.0 mg; entry 16: 91%, 226.5 mg)

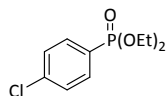

$^1\text{H}$  NMR (400 MHz,  $\text{CDCl}_3$ ):  $\delta$  1.34 (t,  $J_{\text{HH}} = 7.2$  Hz, 6 H), 4.19-4.06 (m, 4 H), 7.46 (dd,  $J_{\text{HH}} = 8.2$  Hz,  $J_{\text{HH}} = 3.6$  Hz, 2 H), 7.76 (dd,  $J_{\text{HH}} = 12.8$  Hz,  $J_{\text{HH}} = 8.4$  Hz, 2 H) ppm.  $^{13}\text{C}$  NMR (100 MHz,  $\text{CDCl}_3$ ):  $\delta$  16.3 (d,  $J_{\text{CP}} = 7.0$  Hz), 62.2 (d,  $J_{\text{CP}} = 5.0$  Hz), 126.9 (d,  $J_{\text{CP}} = 190.0$  Hz), 128.8 (d,  $J_{\text{CP}} = 16.0$  Hz), 133.2 (d,  $J_{\text{CP}} = 10.0$  Hz), 138.9 (d,  $J_{\text{CP}} = 4.0$  Hz) ppm.

**Diethyl 4-iodophenylphosphonate:** Isolated as colorless oil (Table 1, entry 15: 98%, 333.2 mg)

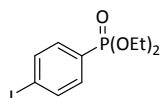

$^1\text{H}$  NMR (400 MHz,  $\text{CDCl}_3$ ):  $\delta$  1.34 (t,  $J_{\text{HH}} = 6.8$  Hz, 6 H), 4.19-4.06 (m, 4 H), 7.54 (dd,  $J_{\text{HH}} = 13$  Hz,  $J_{\text{HH}} = 8.0$  Hz, 2 H), 7.85 (dd,  $J_{\text{HH}} = 8.2$  Hz,  $J_{\text{HH}} = 3.6$  Hz, 2 H) ppm.  $^{13}\text{C}$  NMR (100 MHz,  $\text{CDCl}_3$ ):  $\delta$  16.3 (d,  $J_{\text{CP}} = 7.0$  Hz), 62.3 (d,  $J_{\text{CP}} = 5.0$  Hz), 100.1 (d,  $J_{\text{CP}} = 4.0$  Hz), 127.4 (d,  $J_{\text{CP}} = 189.0$  Hz), 133.1 (d,  $J_{\text{CP}} = 10.0$  Hz), 137.7 (d,  $J_{\text{CP}} = 16.0$  Hz) ppm.

**Diethyl 4-bromophenylphosphonate:** Isolated as colorless oil (Table 1, entry 17: 95%, 278.3 mg).

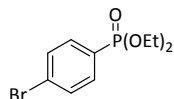

$^1\text{H}$  NMR (400 MHz,  $\text{CDCl}_3$ ):  $\delta$  1.20 (t,  $J_{\text{HH}} = 7.2$  Hz, 6 H), 4.06-3.93 (m, 4 H), 7.32 (dd,  $J_{\text{HH}} = 8.4$  Hz,  $J_{\text{HH}} = 3.2$  Hz, 2 H), 7.63 (dd,  $J_{\text{HH}} = 13.2$  Hz,  $J_{\text{HH}} = 8.4$  Hz, 2 H) ppm.  $^{13}\text{C}$  NMR (100 MHz,  $\text{CDCl}_3$ ):  $\delta$  16.2 (d,  $J_{\text{CP}} = 7.0$  Hz), 62.1 (d,  $J_{\text{CP}} = 5.0$  Hz), 126.9 (d,  $J_{\text{CP}} = 190.0$  Hz), 128.7 (d,  $J_{\text{CP}} = 15.0$  Hz), 133.0 (d,  $J_{\text{CP}} = 10.0$  Hz), 138.7 (d,  $J_{\text{CP}} = 4.0$  Hz) ppm.

**Tetraethyl phenylbis(phosphonate):** Isolated as white powder (Table 1, entry 18: 57%, 199.5 mg; entry 19: 78%, 273 mg)

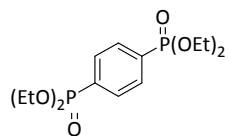

$^1\text{H}$  NMR (400 MHz,  $\text{CDCl}_3$ ):  $\delta$  1.33 (t,  $J_{\text{HH}} = 7.2$  Hz, 12 H), 4.18 - 4.09 (m, 8 H), 7.90 (dd,  $J_{\text{HH}} = 10.2$  Hz,  $J_{\text{HH}} = 6.8$  Hz, 4 H) ppm.  $^{13}\text{C}$  NMR (100 MHz,  $\text{CDCl}_3$ ):  $\delta$  16.3 (d,  $J_{\text{CP}} = 7.0$  Hz), 62.4 (d,  $J_{\text{CP}} = 5.0$  Hz), 128.0 (d,  $J_{\text{CP}} = 155.0$  Hz), 131.6 (dd,  $J_{\text{CP}} = 16.5$  Hz,  $J_{\text{CP}} = 8.0$  Hz) ppm.

**Diethyl 2-phenylvinylphosphonate:** Isolated as colorless oil (Table 1, entry 22: 96%, 230.4 mg).

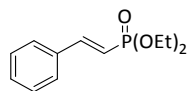

$^1\text{H}$ NMR (400 MHz,  $\text{CDCl}_3$ ):  $\delta$  1.37 (t,  $J_{\text{HH}} = 6.8$  Hz, 6 H), 4.18-4.11 (m, 4 H), 6.3 (t,  $J_{\text{HH}} = J_{\text{HP}} = 17.6$ , 1H), 7.57-7.39 (m, 6H), ppm.  $^{13}\text{C}$  NMR (100 MHz,  $\text{CDCl}_3$ ):  $\delta$  16.4 (d,  $J_{\text{CP}} = 6.0$  Hz), 61.8 (d,  $J_{\text{CP}} = 6.0$  Hz), 113.8 (d,  $J_{\text{CP}} = 190.0$  Hz), 127.7, 128.1, 128.8, 130.2, 134.7, 134.9, 148.7 (d,  $J_{\text{CP}} = 7.0$  Hz) ppm.

Copies of  $^1\text{H}$  and  $^{13}\text{C}$  NMR spectra

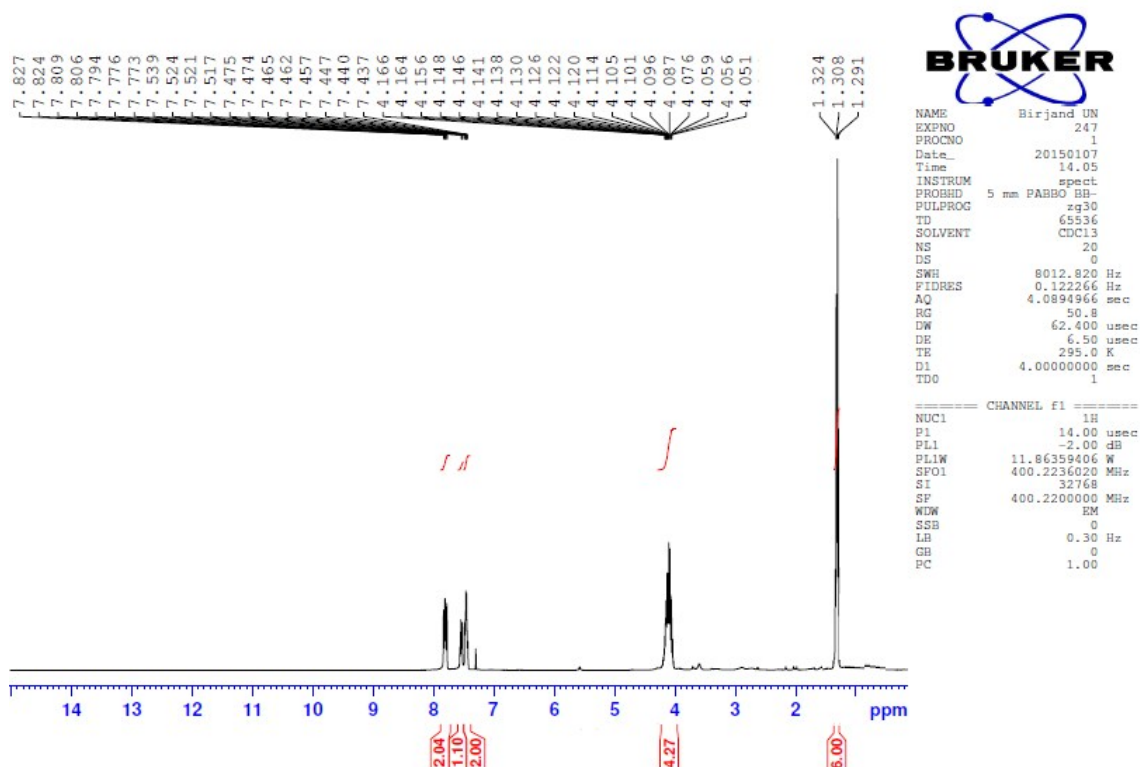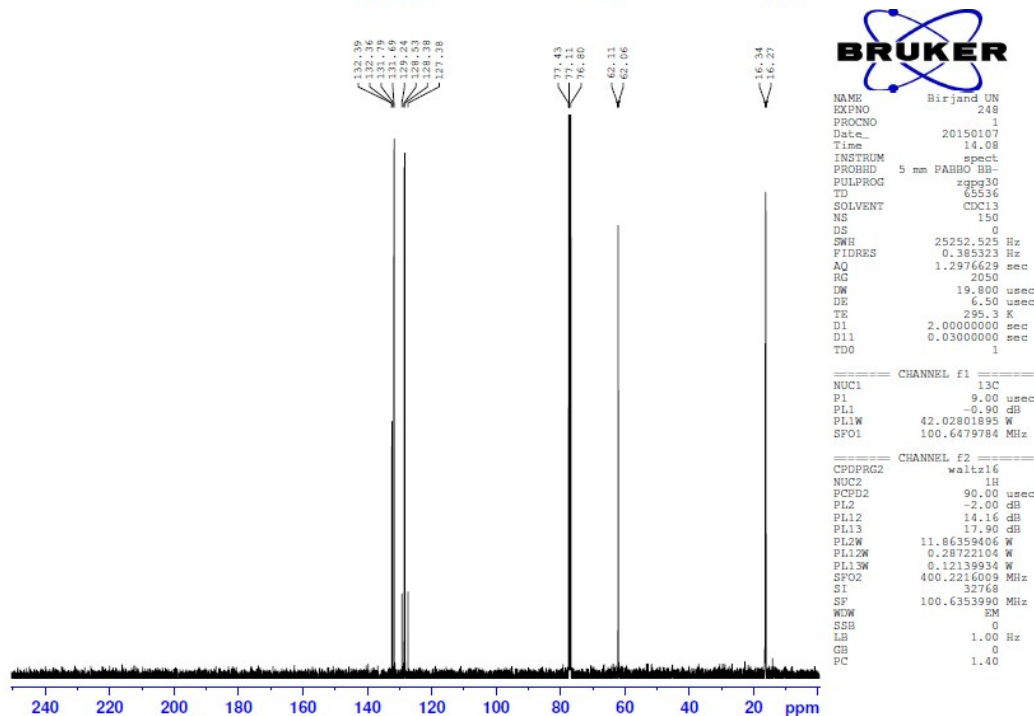

<sup>1</sup>H NMR and <sup>13</sup>C NMR of diethylphenylphosphonate

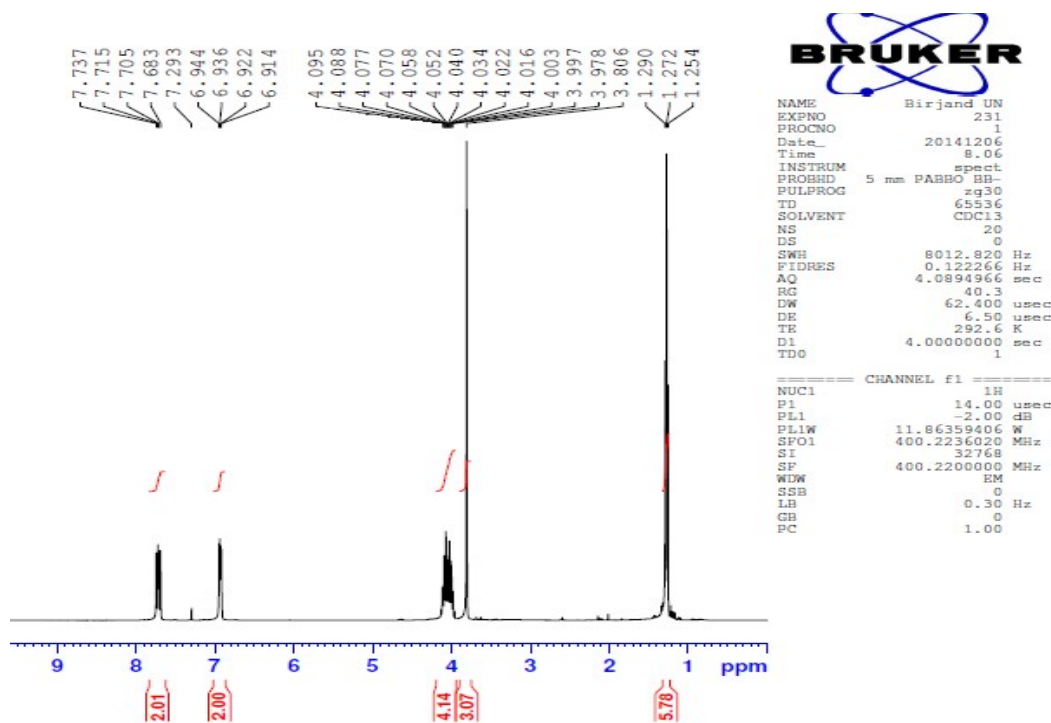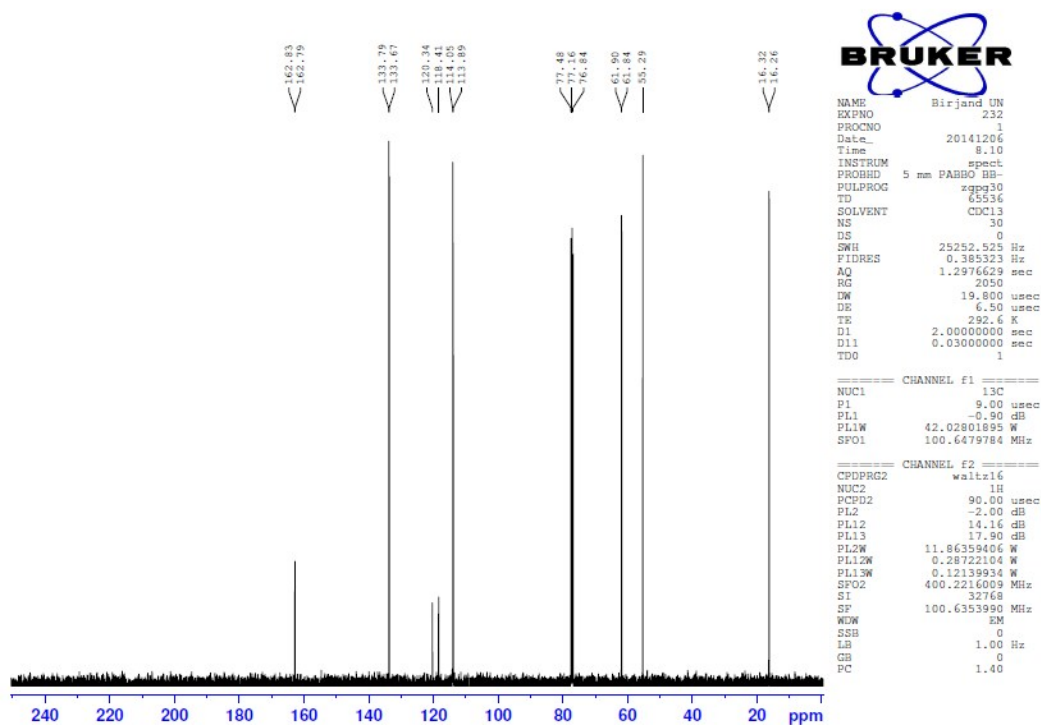

<sup>1</sup>H NMR and <sup>13</sup>C NMR of diethyl 4-methoxyphenylphosphonate

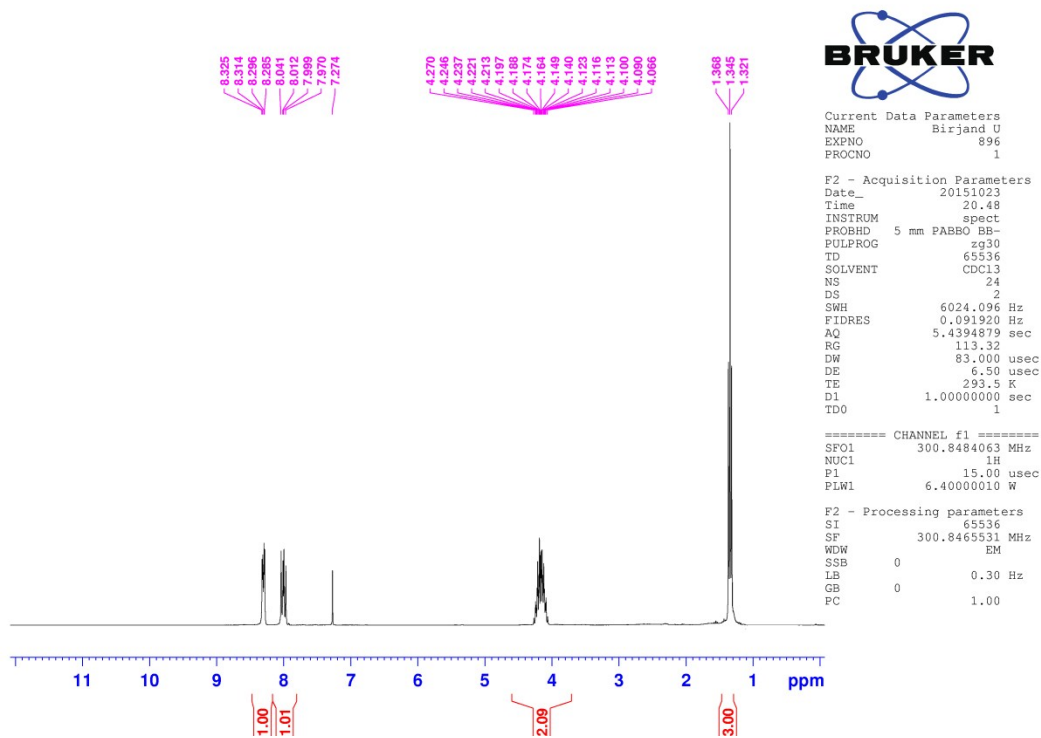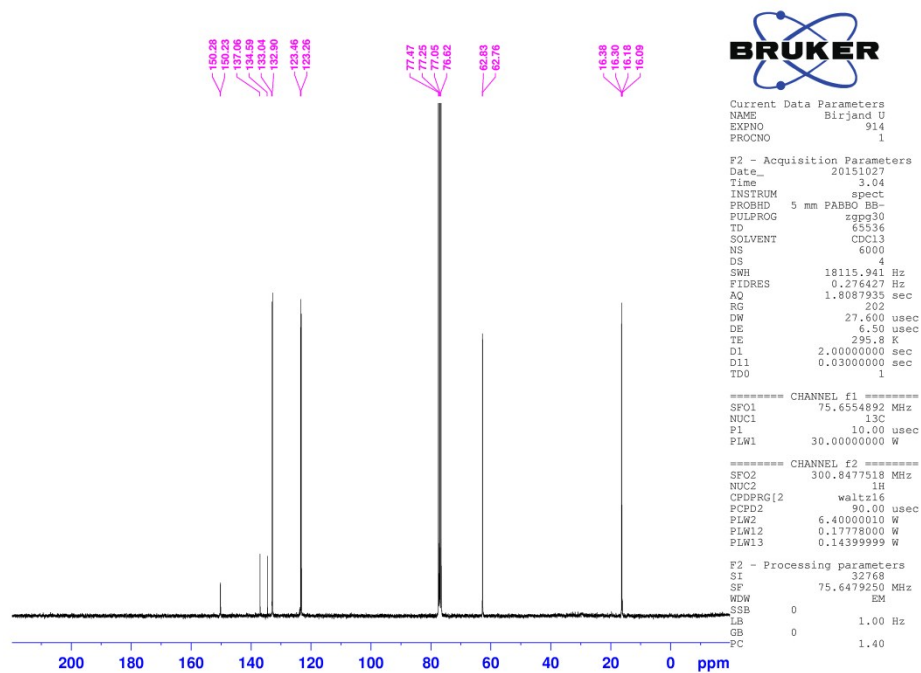

$^1\text{H}$  NMR and  $^{13}\text{C}$  NMR of diethyl (4-nitrophenyl)phosphonate

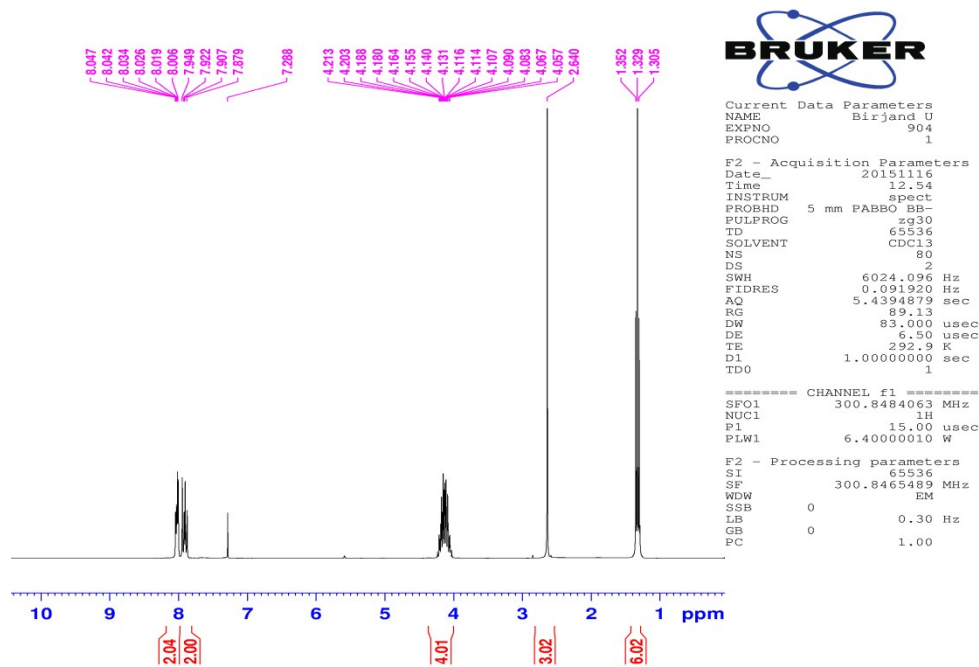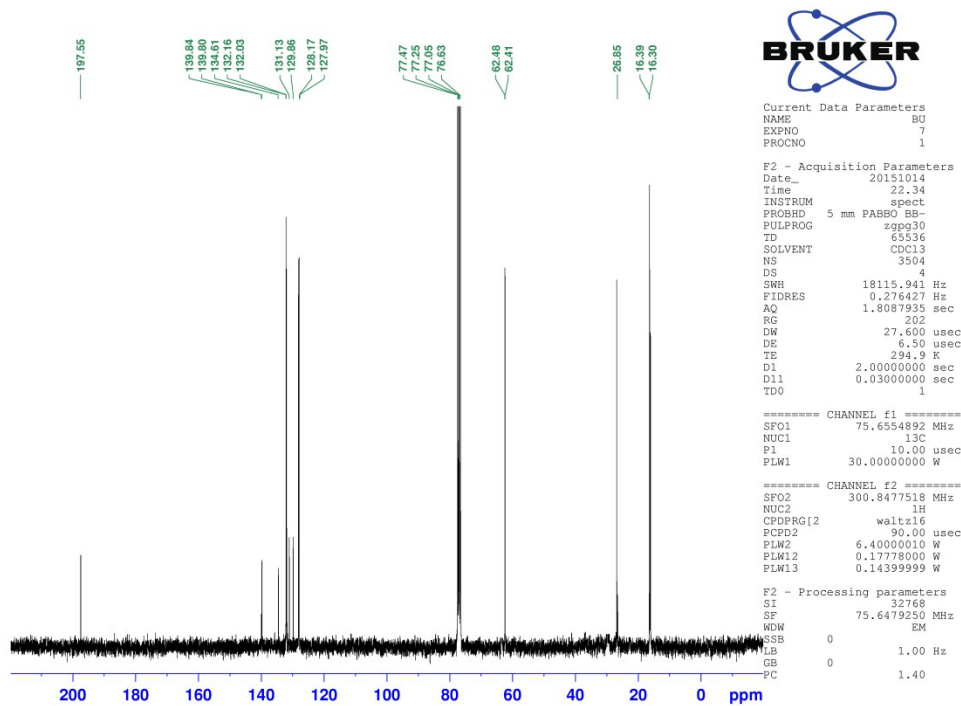

<sup>1</sup>H NMR and <sup>13</sup>C NMR of diethyl 4-acetylphenylphosphonate

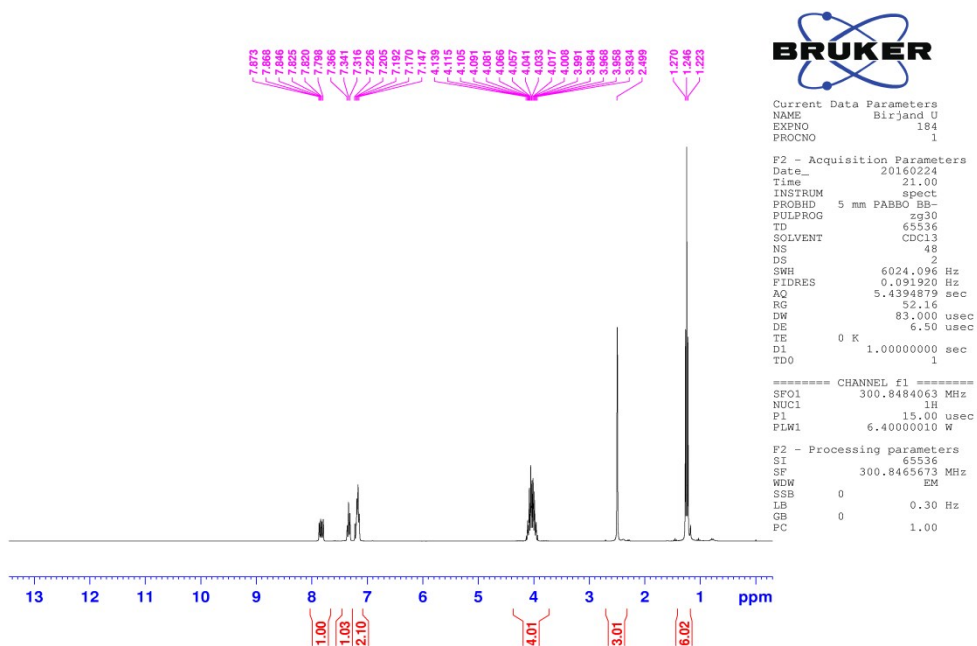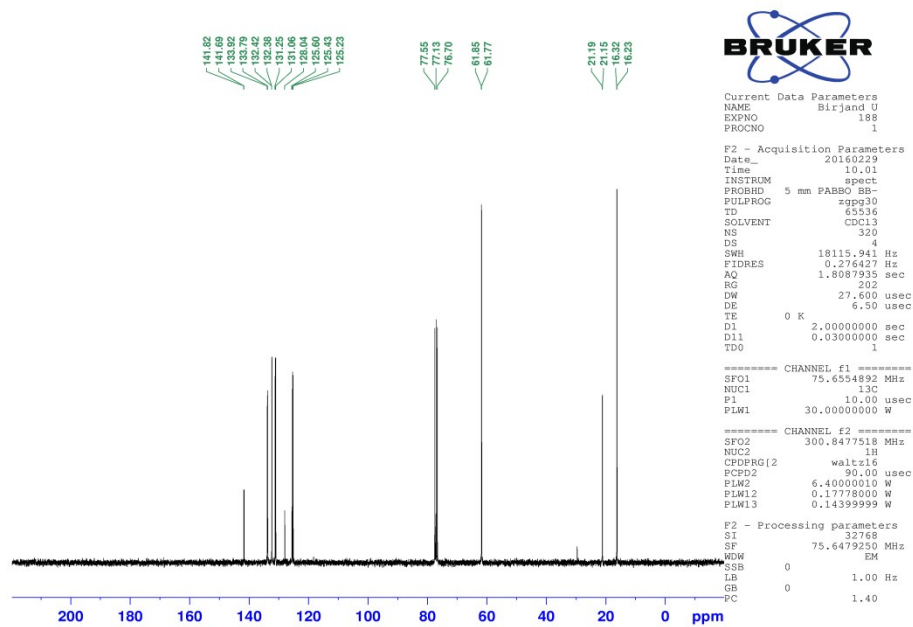

<sup>1</sup>H NMR and <sup>13</sup>C NMR of diethyl 2-methylphenylphosphonate

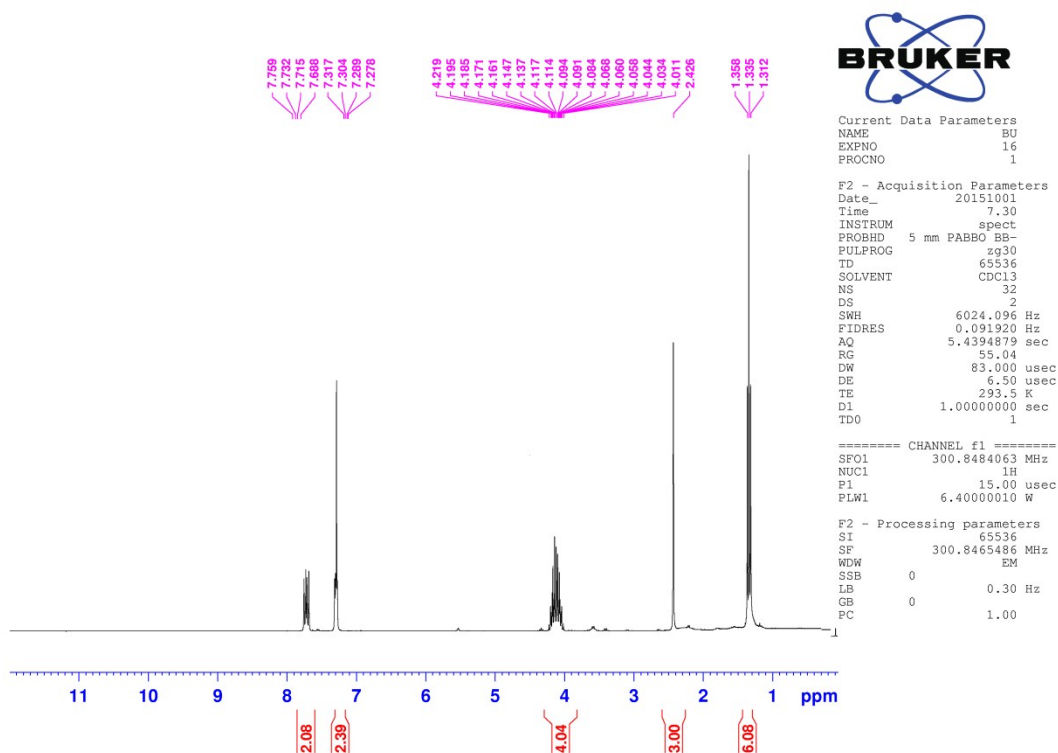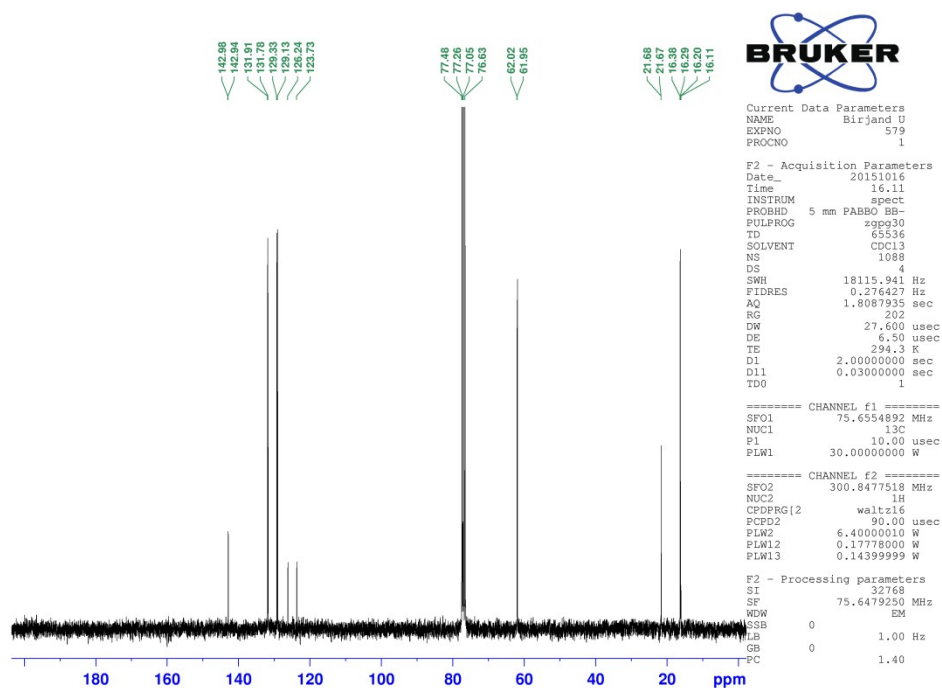

$^1\text{H}$  NMR and  $^{13}\text{C}$  NMR of diethyl 4-tolylphosphonate

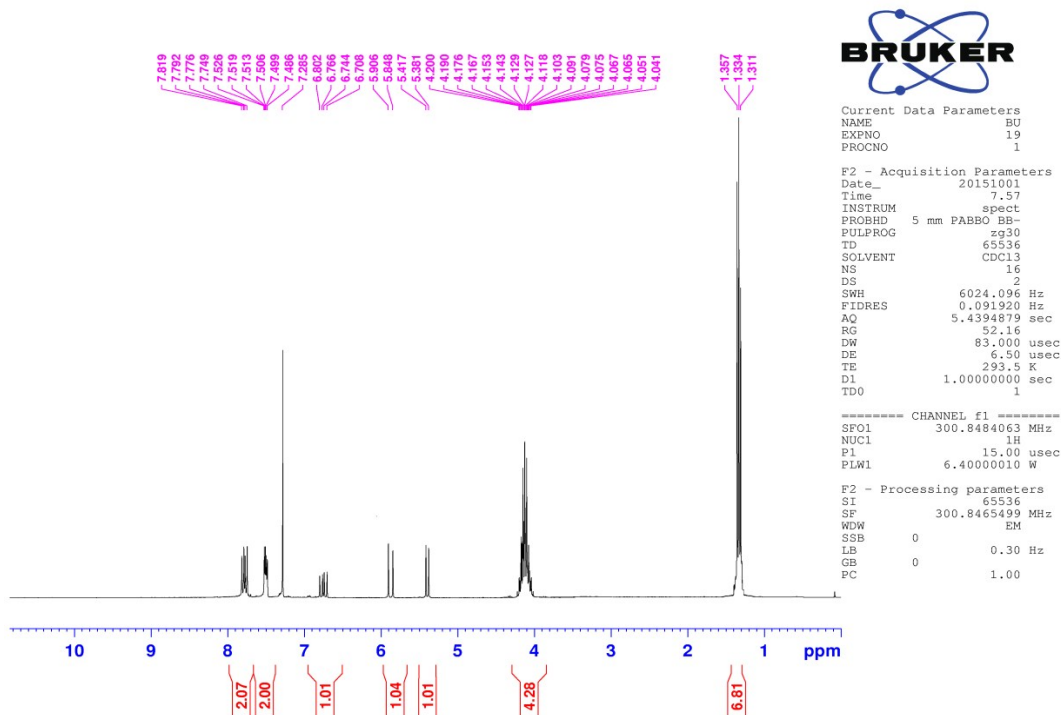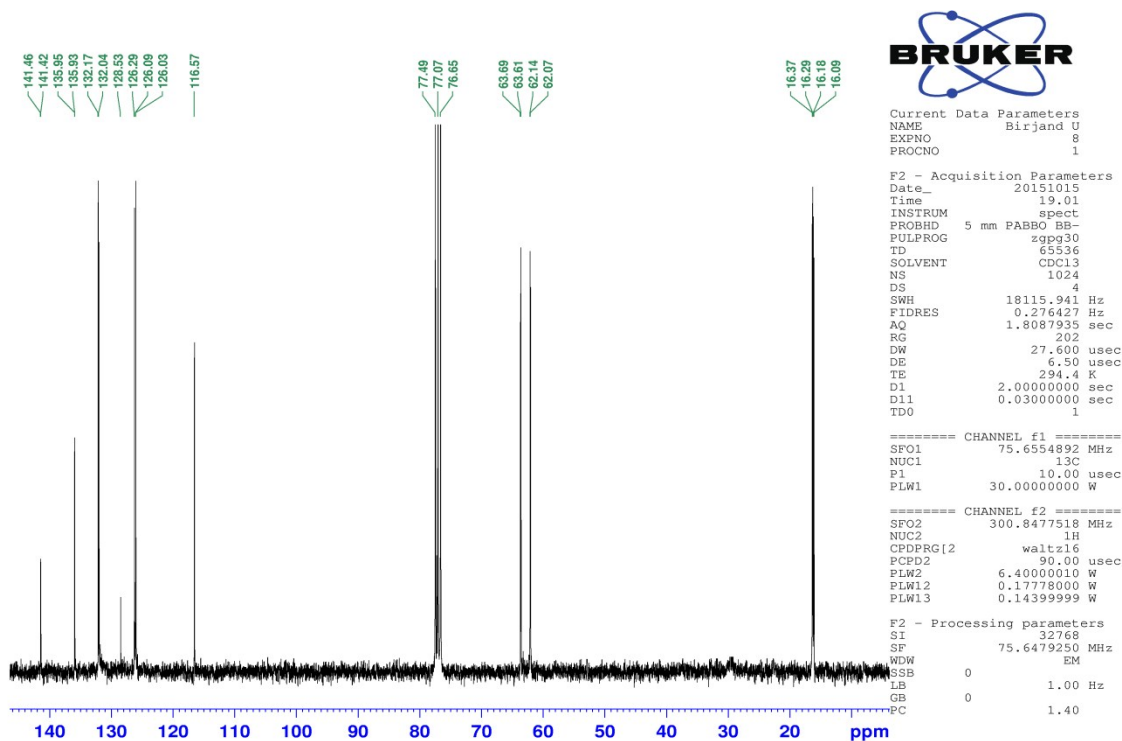

<sup>1</sup>H NMR and <sup>13</sup>C NMR of diethyl 4-vinylphenylphosphonate

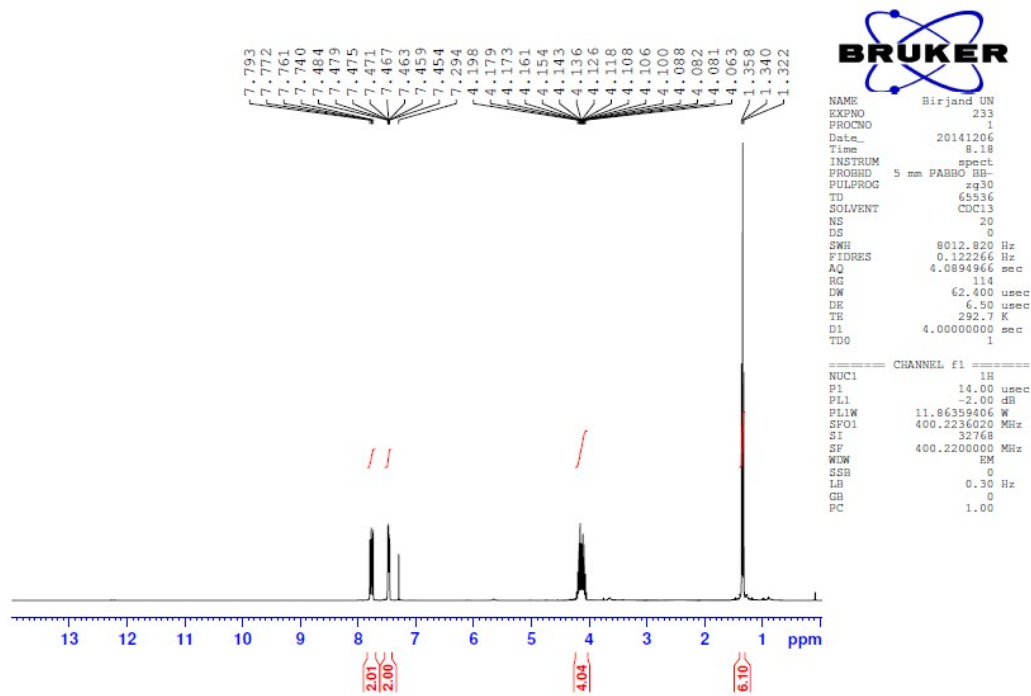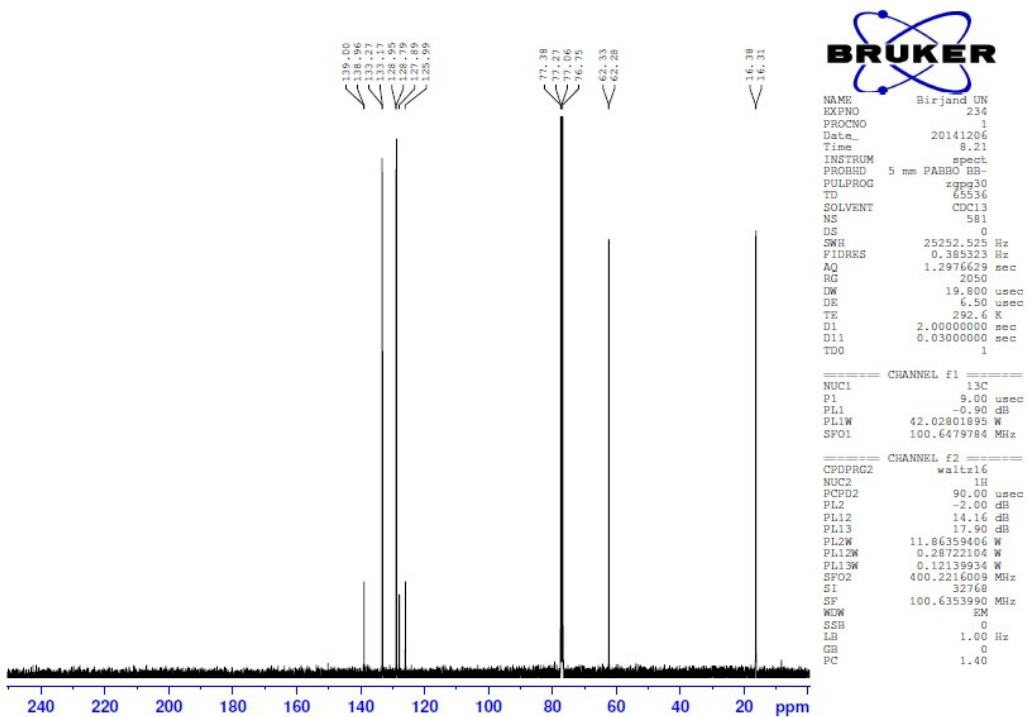

<sup>1</sup>H NMR and <sup>13</sup>C NMR of diethyl 4-chlorophenylphosphonate

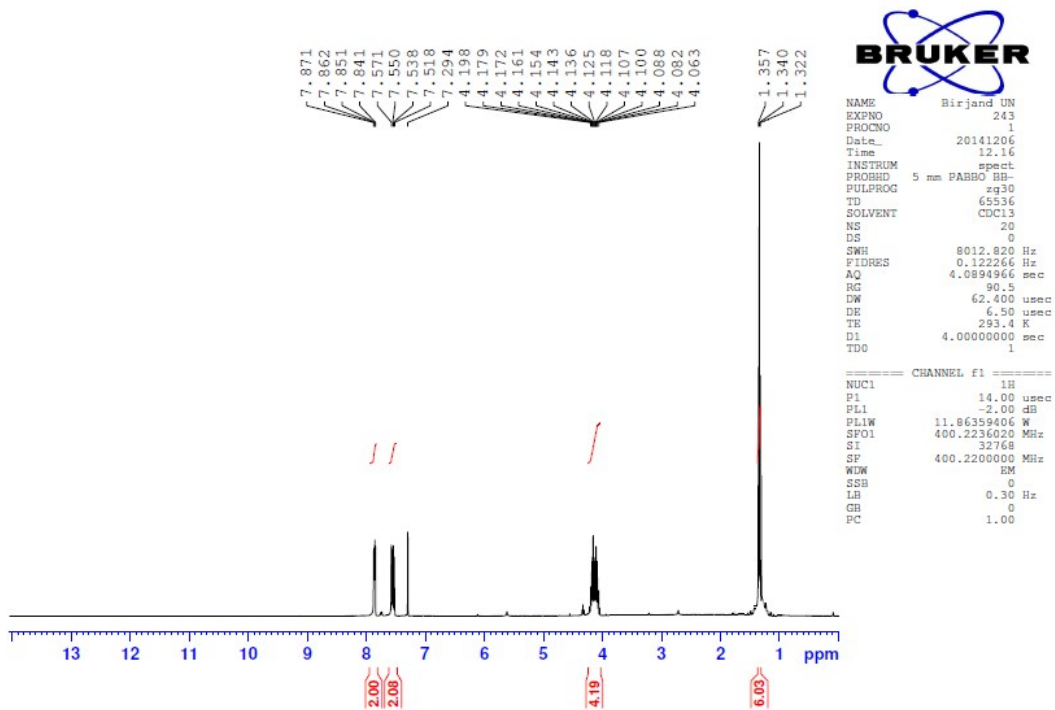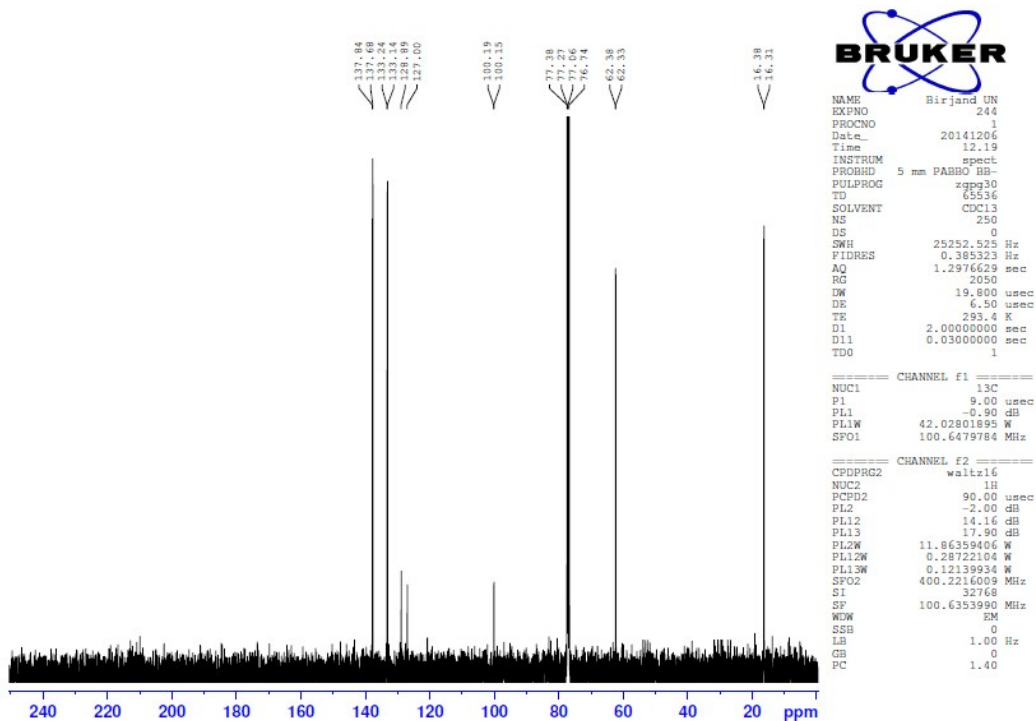

<sup>1</sup>H NMR and <sup>13</sup>C NMR of diethyl 4-iodophenylphosphonate

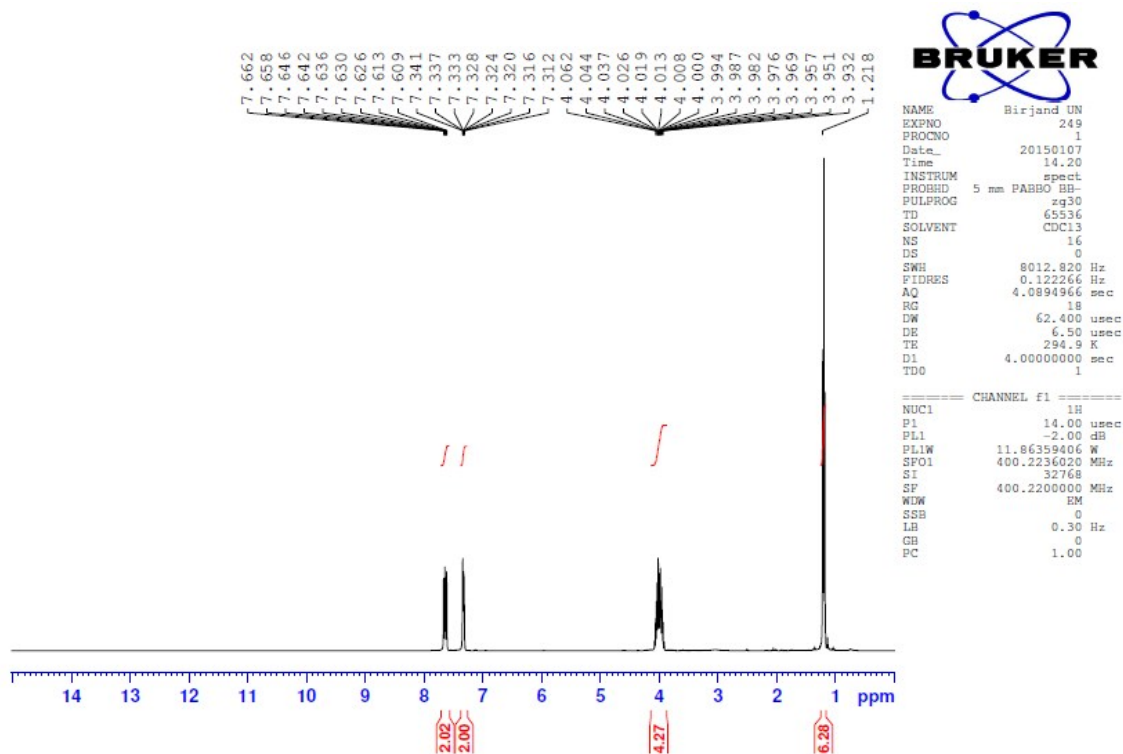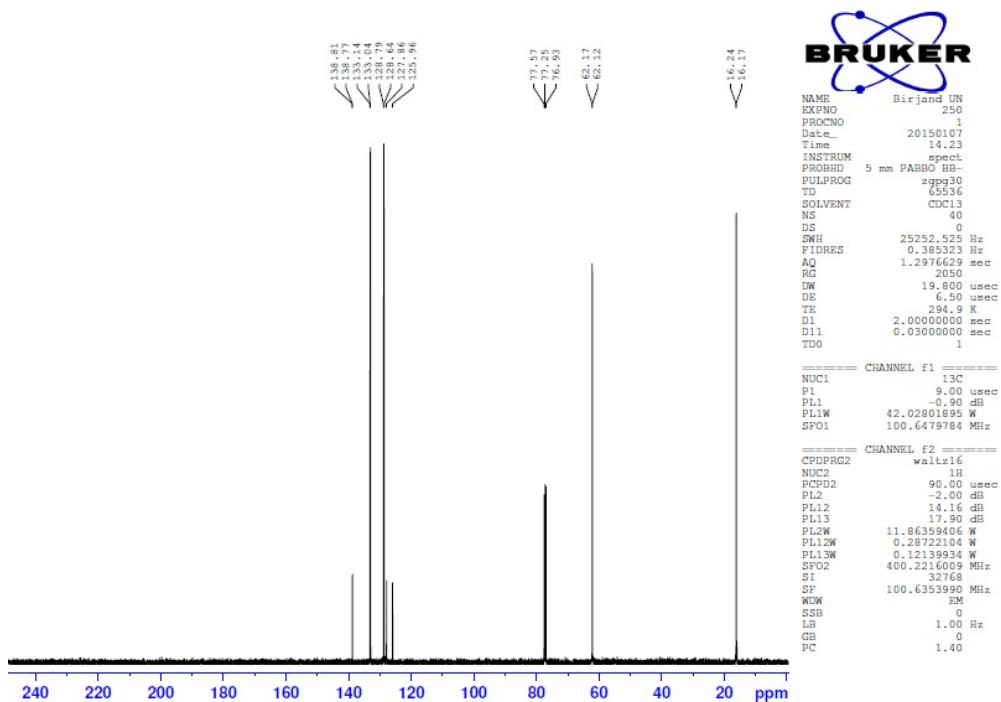

$^1\text{H}$  NMR and  $^{13}\text{C}$  NMR of diethyl 4-bromophenylphosphonate

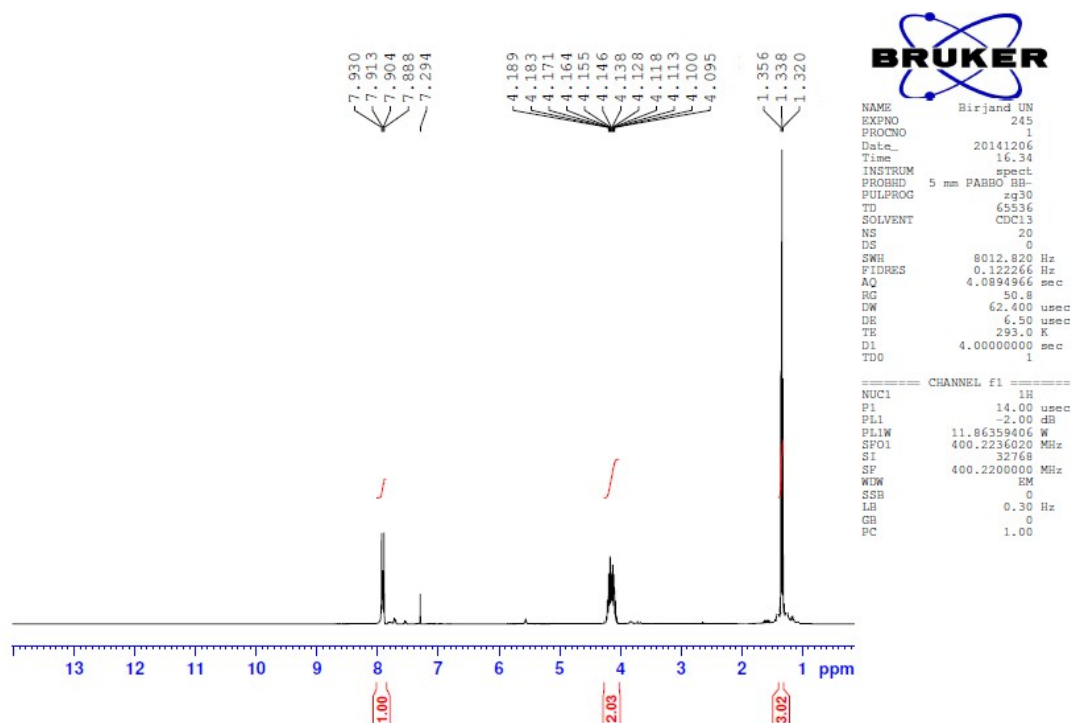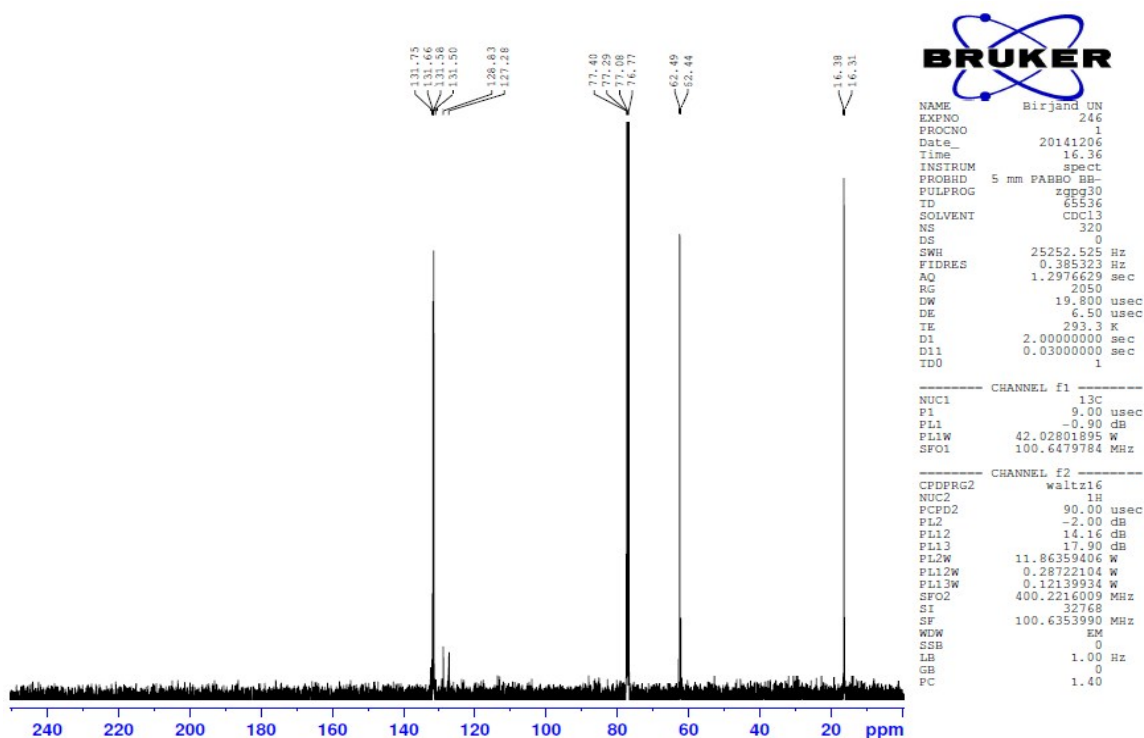

$^1\text{H}$  NMR and  $^{13}\text{C}$  NMR of tetraethylphenylbis(phosphonate)

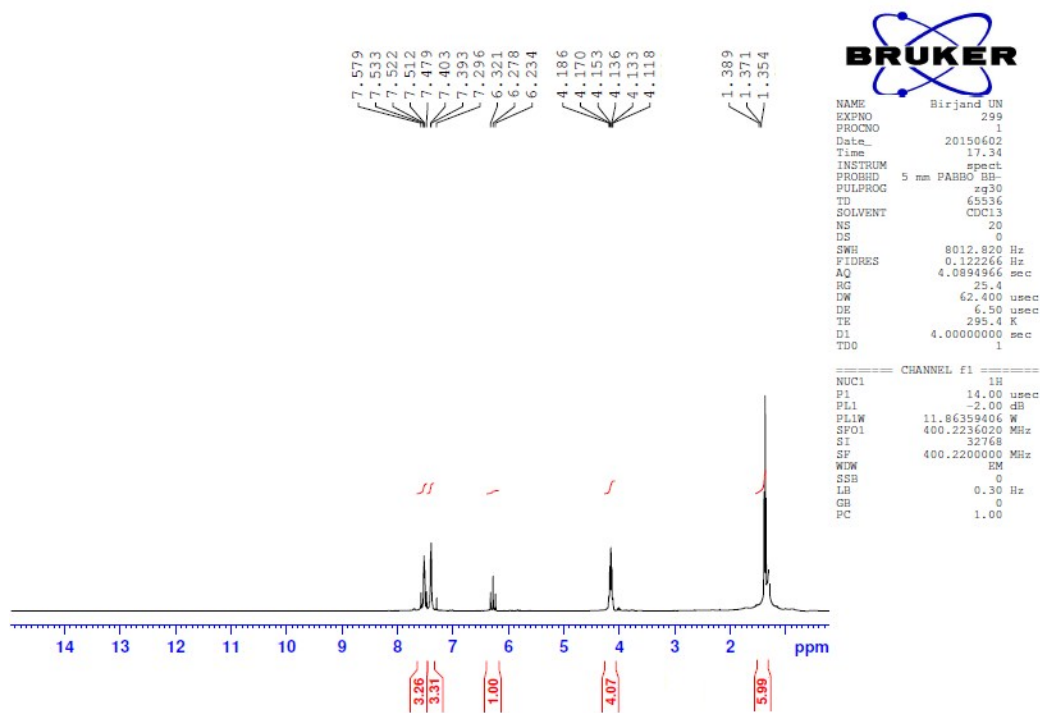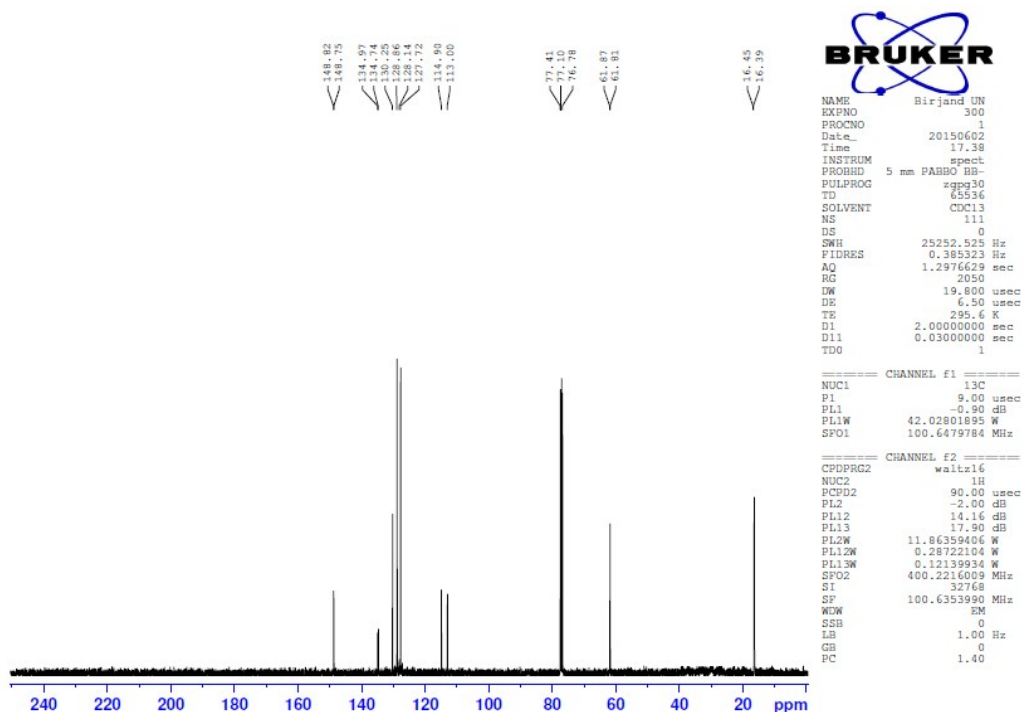

$^1\text{H}$  NMR and  $^{13}\text{C}$  NMR of diethyl 2-phenylvinylphosphonate

## References

- 1 (a) B. Z. Tang, Y. Geng, J. W. Y. Lam, B. Li, X. Jing, X. Wang, F. Wang, A. B. Pakhomov, X. X. Zhang, *Chem. Mater.* **1999**, *11*, 1581-1589; (b) K. M. Ho, P. Li, *Langmuir* **2008**, *24*, 1801-1807.
- 2 S. Sobhani, Z. Pakdin Parizi, *Appl. Catal. A: Gen.* **2014**, *479*, 112-120.
